# Supplementary material
Source: PubMed Central journal article supplement (PMC3993386)
Supplement: IAI.01640-13_zii004140593so1.pdf [file IAI.01640-13_zii004140593so1.pdf]

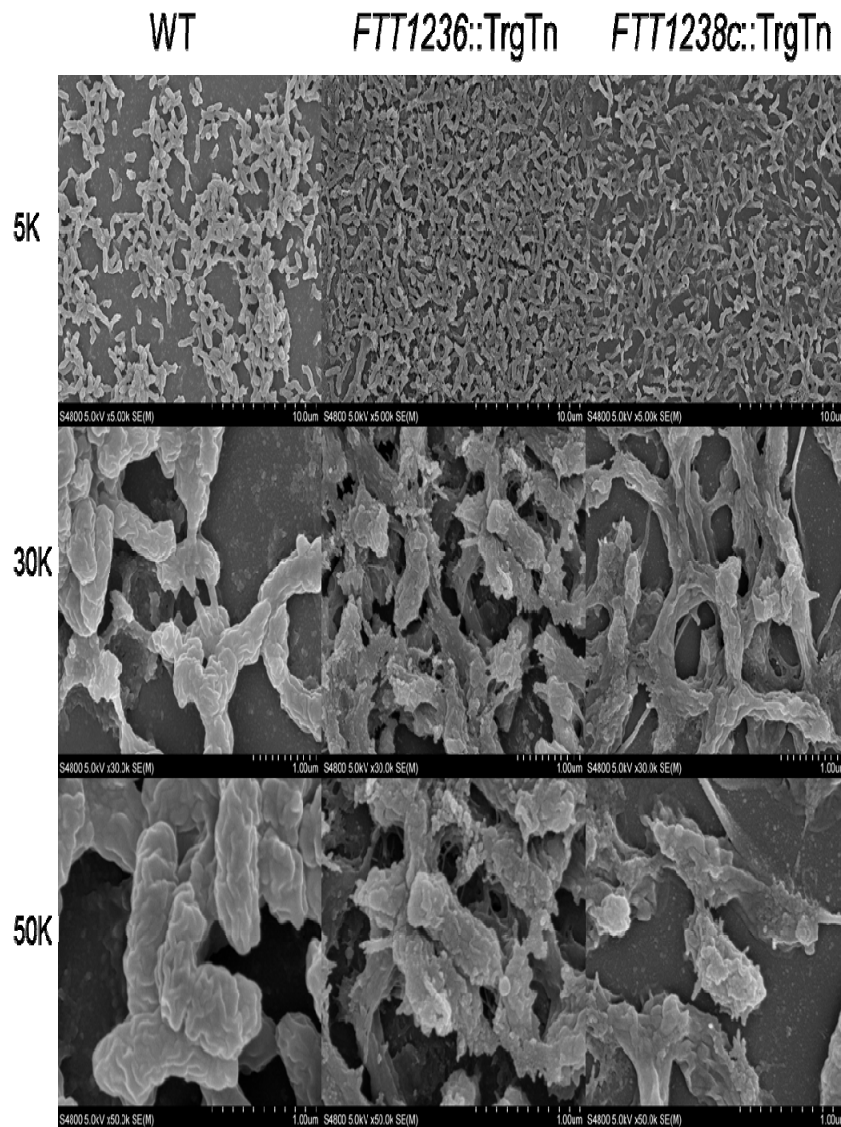

Broth cultures of *F. tularensis* Schu S4 and mutants in 1236 and 1238c were plated onto MMH agar such that well isolated single colonies grew. Single colonies were stamped onto poly-L-lysine coated silicon chips. A final concentration of 4% paraformaldehyde was used to both kill the bacteria and fix the organisms for microscopy analysis. The samples were washed with dH<sub>2</sub>O, fixed with 2% glutaraldehyde and coated with platinum before being viewed on an S-4000 scanning electron microscope (Hitachi, Mountain View, CA). Samples were viewed in the Central Microscopy Research Facility at the University of Iowa.
